# Supplementary material
Source: PubMed Central journal article supplement (PMC9598021)
Supplement: 13054_2022_4200_MOESM2_ESM.pdf [file 13054_2022_4200_MOESM2_ESM.pdf]

WHOLE POPULATION

| Gas Volume                              | WHOLE LUNG |     | HYPO/NON-INFLATED LUNG |     |
|-----------------------------------------|------------|-----|------------------------|-----|
|                                         | MEAN       | SD  | MEAN                   | SD  |
| Hyperinflated area (cm <sup>2</sup> )   | 994        | 756 | x                      | x   |
| Normoinflated area (cm <sup>2</sup> )   | 1305       | 496 | x                      | x   |
| Poorly inflated area (cm <sup>2</sup> ) | 889        | 398 | 889                    | 398 |
| Non-inflated area (cm <sup>2</sup> )    | 372        | 321 | 372                    | 321 |
| Hyperinflated area %                    | 27         | 17  | x                      | x   |
| Normoinflated area %                    | 37         | 11  | x                      | x   |
| Poorly inflated area %                  | 26         | 11  | 74                     | 15  |
| Non-inflated area %                     | 11         | 10  | 26                     | 15  |

| Blood Volume                         | WHOLE LUNG |      | HYPO/NON-INFLATED LUNG |      |
|--------------------------------------|------------|------|------------------------|------|
|                                      | MEAN       | SD   | MEAN                   | SD   |
| Non-perfused area (cm <sup>2</sup> ) | 461        | 286  | 176                    | 150  |
| Perfused area (cm <sup>2</sup> )     | 3005       | 913  | 1030                   | 479  |
| Non-Perfused area %                  | 14         | 8    | 15                     | 11   |
| Perfused area %                      | 86         | 8    | 85                     | 11   |
| Kurtosis                             | 2.99       | 0.81 | 2.47                   | 1.11 |

Wilcoxon rank sum test. Whole vs Hypoinflated

p ( $\alpha = 0.05$ )

|          |
|----------|
| 0.74     |
| < 0.01 * |
| 0.06     |
| 0.06     |
| < 0.01 * |

Table E1

No-Steroids

| Gas Volume Maps                         | WHOLE LUNG |     | HYPO/NON-INFLATED LUNG |     |
|-----------------------------------------|------------|-----|------------------------|-----|
|                                         | MEAN       | SD  | MEAN                   | SD  |
| Hyperinflated area (cm <sup>2</sup> )   | 1120       | 703 | x                      | x   |
| Normoinflated area (cm <sup>2</sup> )   | 1456       | 587 | x                      | x   |
| Poorly inflated area (cm <sup>2</sup> ) | 960        | 356 | 960                    | 356 |
| Non-inflated area (cm <sup>2</sup> )    | 483        | 297 | 483                    | 297 |
| Hyperinflated area %                    | 27         | 13  | x                      | x   |
| Normoinflated area %                    | 36         | 9   | x                      | x   |
| Poorly inflated area %                  | 24         | 8   | 68                     | 12  |
| Non-inflated area %                     | 13         | 8   | 32                     | 12  |

| Blood Volume Maps                    | WHOLE LUNG |      | HYPO/NON-INFLATED LUNG |      |
|--------------------------------------|------------|------|------------------------|------|
|                                      | MEAN       | SD   | MEAN                   | SD   |
| Non-perfused area (cm <sup>2</sup> ) | 568        | 346  | 261                    | 144  |
| Perfused area (cm <sup>2</sup> )     | 3380       | 1148 | 1125                   | 418  |
| Non-Perfused area %                  | 15         | 7    | 19                     | 8    |
| Perfused area %                      | 85         | 7    | 81                     | 8    |
| Kurtosis                             | 2.43       | 0.50 | 1.91                   | 0.35 |

Panel A

Wilcoxon rank sum test. Whole vs Hypoinflated

| p (α = 0.05) |   |
|--------------|---|
| 0.01         | * |
| < 0.01       | * |
| < 0.01       | * |
| < 0.01       | * |
| < 0.01       | * |

Steroids

| Gas Volume Maps                         | WHOLE LUNG |     | HYPO/NON-INFLATED LUNG |     |
|-----------------------------------------|------------|-----|------------------------|-----|
|                                         | MEAN       | SD  | MEAN                   | SD  |
| Hyperinflated area (cm <sup>2</sup> )   | 944        | 778 | x                      | x   |
| Normoinflated area (cm <sup>2</sup> )   | 1245       | 448 | x                      | x   |
| Poorly inflated area (cm <sup>2</sup> ) | 861        | 414 | 861                    | 415 |
| Non-inflated area (cm <sup>2</sup> )    | 328        | 324 | 328                    | 324 |
| Hyperinflated area %                    | 26         | 19  | x                      | x   |
| Normoinflated area %                    | 37         | 11  | x                      | x   |
| Poorly inflated area %                  | 26         | 12  | 75                     | 15  |
| Non-inflated area %                     | 10         | 11  | 25                     | 15  |

| Blood Volume Maps                    | WHOLE LUNG |      | HYPO/NON-INFLATED LUNG |      |
|--------------------------------------|------------|------|------------------------|------|
|                                      | MEAN       | SD   | MEAN                   | SD   |
| Non-perfused area (cm <sup>2</sup> ) | 419        | 250  | 143                    | 140  |
| Perfused area (cm <sup>2</sup> )     | 2857       | 767  | 993                    | 500  |
| Non-Perfused area %                  | 13         | 8    | 13                     | 11   |
| Perfused area %                      | 87         | 8    | 87                     | 11   |
| Kurtosis                             | 3.22       | 0.80 | 2.69                   | 1.21 |

Panel B

Wilcoxon rank sum test. Whole vs Hypoinflated

| p (α = 0.05) |   |
|--------------|---|
| < 0.01       | * |
| < 0.01       | * |
| 0.42         |   |
| < 0.01       | * |
| < 0.01       | * |

No-Steroids vs Steroids

| Gas Volume Maps p (α = 0.05)            |        |
|-----------------------------------------|--------|
| Hyperinflated area (cm <sup>2</sup> )   | 0.24   |
| Normoinflated area (cm <sup>2</sup> )   | 0.23   |
| Poorly inflated area (cm <sup>2</sup> ) | 0.30   |
| Non-inflated area (cm <sup>2</sup> )    | 0.01 * |

| WHOLE LUNG                           |          |
|--------------------------------------|----------|
| Blood Volume Maps p (α = 0.05)       |          |
| Non-perfused area (cm <sup>2</sup> ) | 0.09     |
| Perfused area (cm <sup>2</sup> )     | 0.09     |
| Non-Perfused area %                  | 0.11     |
| Perfused area %                      | 0.10     |
| Kurtosis                             | < 0.01 * |

| HYPO/NON-INFLATED LUNG               |          |
|--------------------------------------|----------|
| Blood Volume Maps p (α = 0.05)       |          |
| Non-perfused area (cm <sup>2</sup> ) | < 0.01 * |
| Perfused area (cm <sup>2</sup> )     | 0.25     |
| Non-Perfused area %                  | < 0.01 * |
| Perfused area %                      | 0.25     |
| Kurtosis                             | < 0.01 * |

Panel C

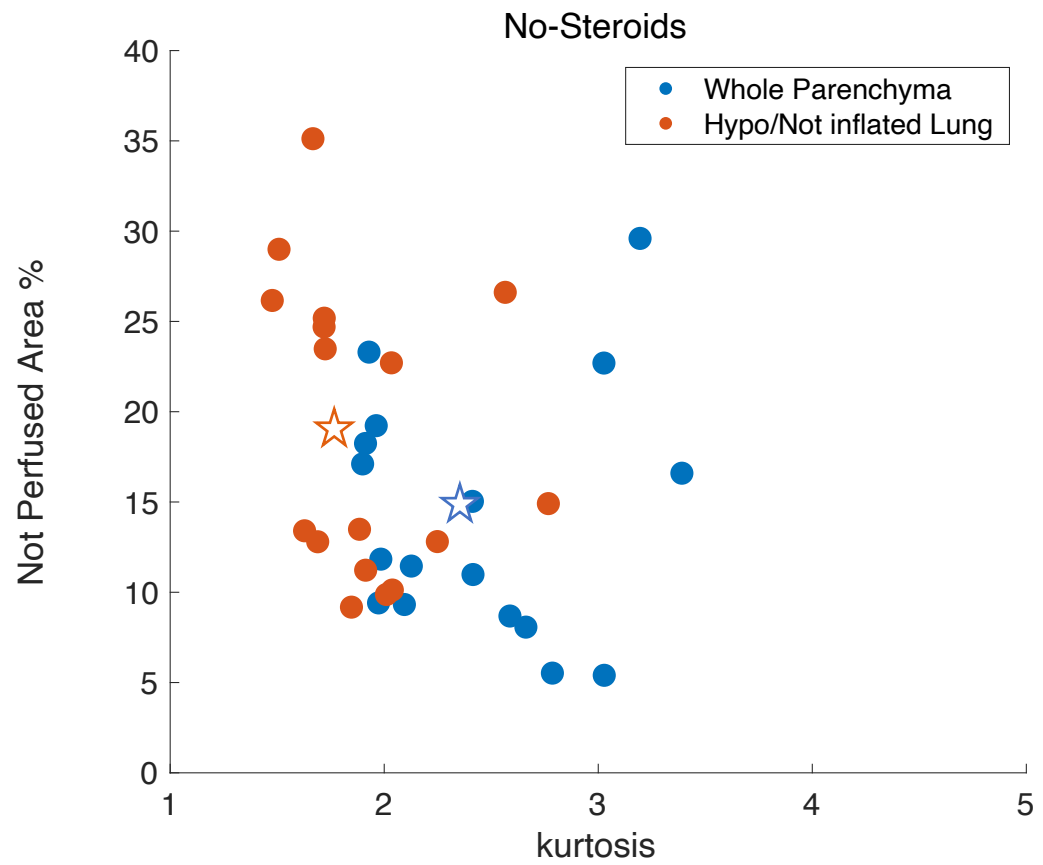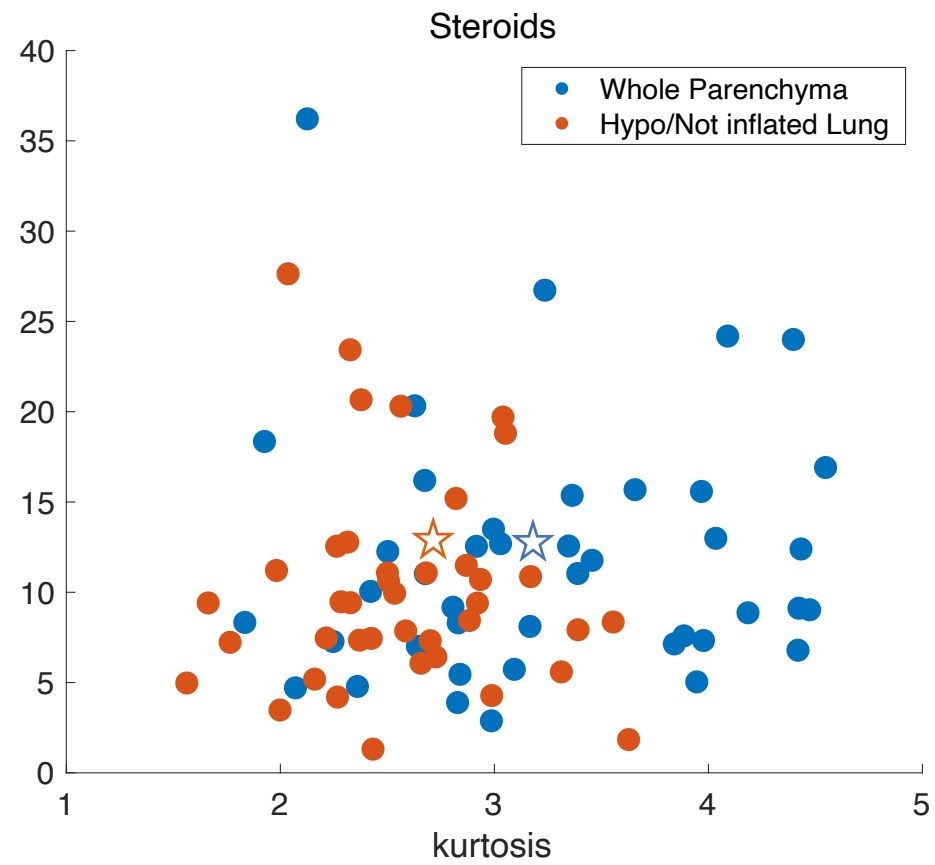

Figure E1
